# Supplementary material for: Constructing porous MOF based on the assembly of layer framework and p-sulfonatocalix[4]arene nanocapsule with proton-conductive property
Source: Royal Society of Chemistry journal article supplement (doi:10.1039/c2ce26075a), 2013-10-21
Supplement: c2ce26075a.pdf [file c2ce26075a.pdf]

## Supporting Information

### **Constructing porous MOF based on the assembly of layer framework and *p*-sulfonatocalix[4]arene nanocapsule with proton-conductive property**

**Guo-Li Zheng,<sup>b</sup> Guo-Cheng Yang,<sup>c</sup> Shu-Yan Song,<sup>a</sup> Xue-Zhi Song<sup>a</sup> and Hong-Jie Zhang<sup>\*a</sup>**

*<sup>a</sup>State Key Laboratory of Application of Rare Earth Resources utilization, Changchun Institute of Applied Chemistry, Chinese Academy of Sciences, Changchun 130022, P. R. China.*

*<sup>b</sup>Key Laboratory of Catalysis and Materials Science of the State Ethnic Affairs Commission & Ministry of Education, Hubei Province, South-Central University for Nationalities, Wuhan, 430074, PR China*

*<sup>c</sup>School of Chemistry and Life Science, Changchun University of Technology, Changchun 130012, P. R. China*

\*Corresponding author. Fax: +86-431-85698041; Tel: +86-431-85262127.

E-mail address: [hongjie@ciac.jl.cn](mailto:hongjie@ciac.jl.cn) (H.-J. Zhang)

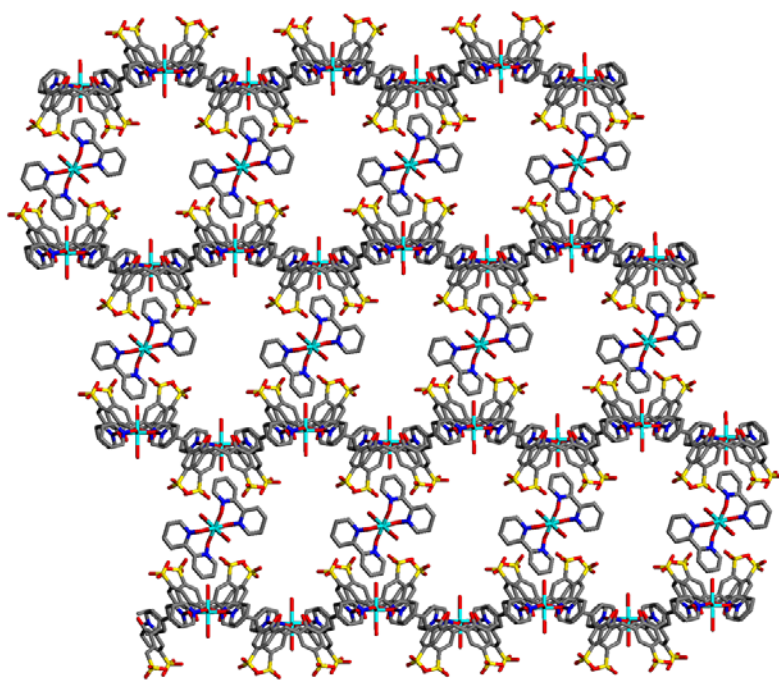

Fig S1 The Packing diagram down the *b* axis, showing the channel structure of compound **1**, the dissociative water molecules are omitted for clarity.

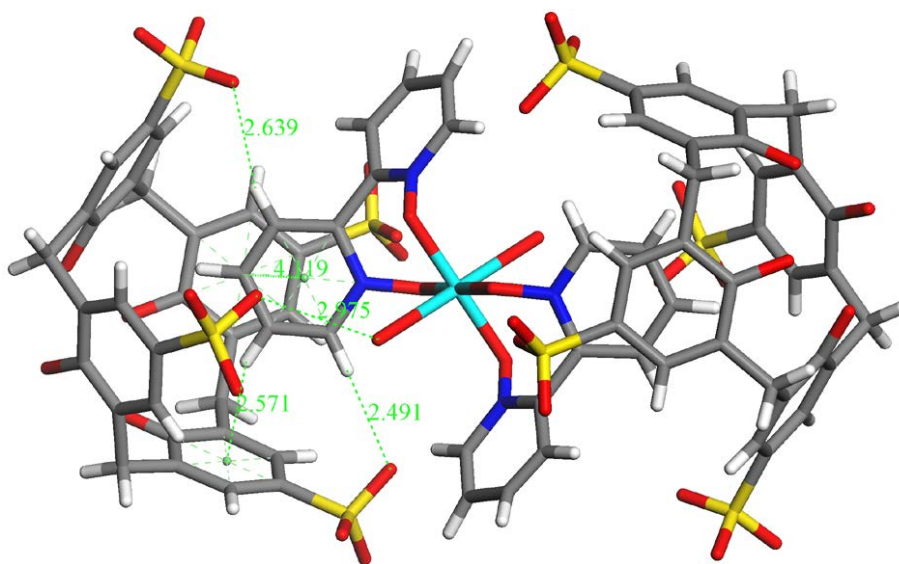

Fig S2 Structure of the supramolecular nanocapsule based on the *p*-sulfonatocalix[4]arenes and [Cu(bpdo)<sub>2</sub>2H<sub>2</sub>O]<sup>2+</sup>.

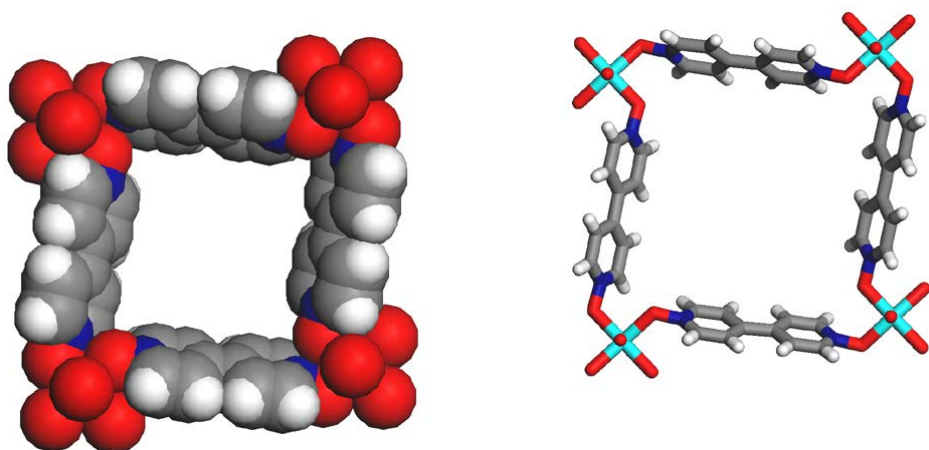

Fig S3 Structure of bowl shape frameworks based on the L and copper ions.

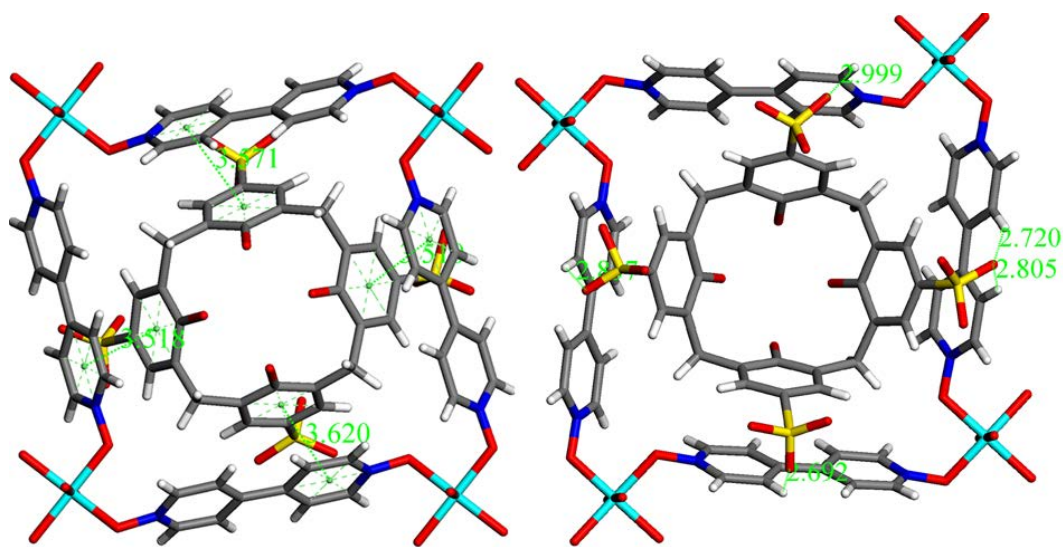

Fig S4 The weak interactions between the host bowl and the *p*-sulfonatocalix[4]arenes of capsules

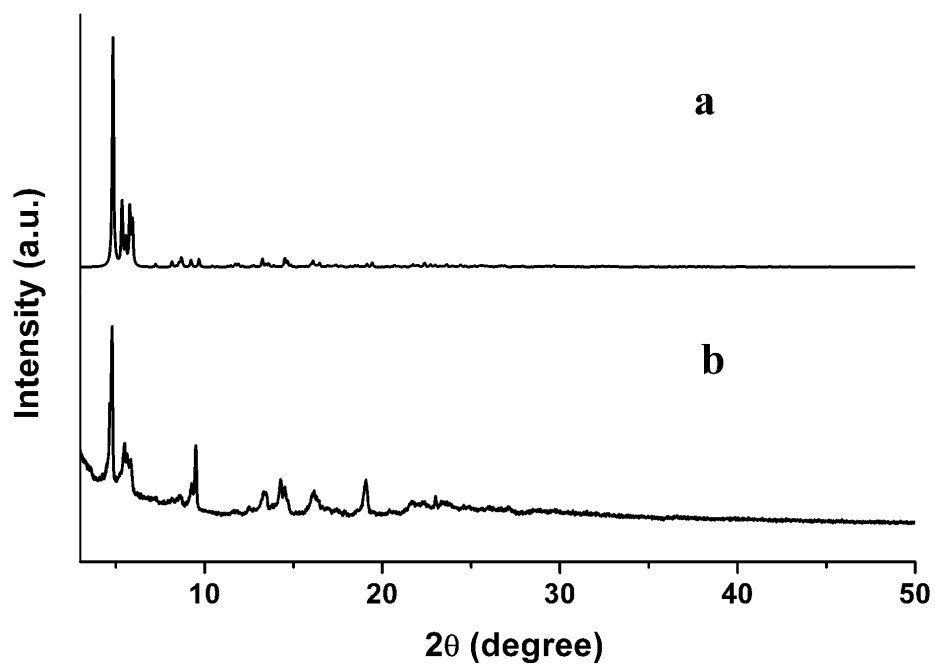

Fig S5 (a) Simulated from single crystal data; (b) Powder XRD patterns of compound 1.

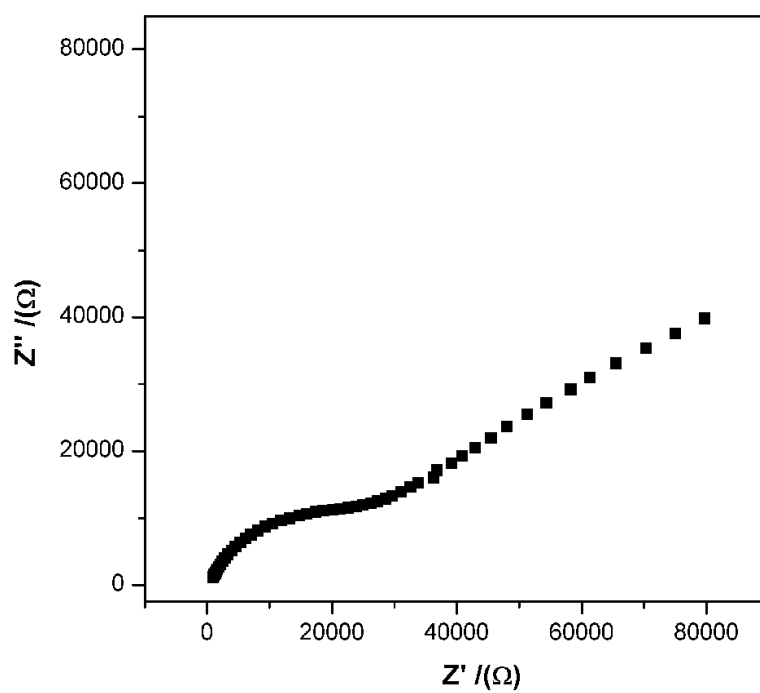

Fig S6 Nyquist plot of compound 1.

| T / K | 1000/K | R / $\Omega$ | $\sigma = 1/RS$ |
|-------|--------|--------------|-----------------|
| 298   | 3.3557 | 5.16E+04     | 5.42E-07        |
| 308   | 3.2468 | 3.08E+04     | 9.08E-07        |
| 318   | 3.1447 | 1.11E+04     | 2.51E-06        |
| 328   | 3.0488 | 7158         | 3.90E-06        |
| 338   | 2.9586 | 3529         | 7.92E-06        |
| 348   | 2.8736 | 1864         | 1.50E-05        |
| 358   | 2.7933 | 907          | 3.08E-05        |

Table S1 Proton Conductivity at different temperatures under 95% RH for compound 1.

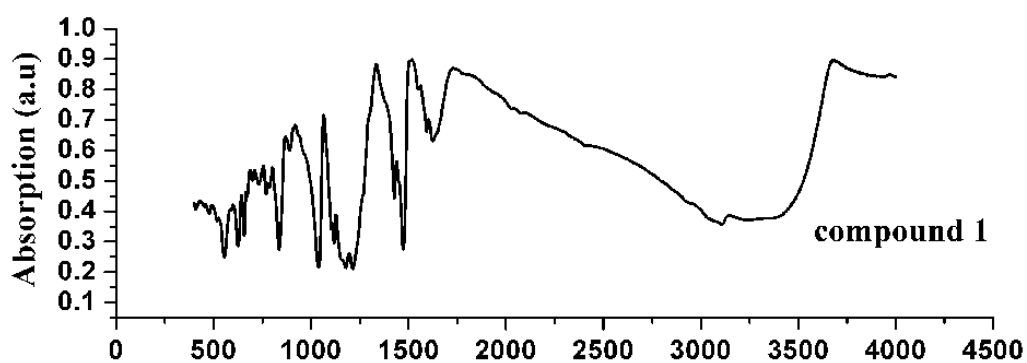

Fig S7 The infrared spectra of compounds 1.

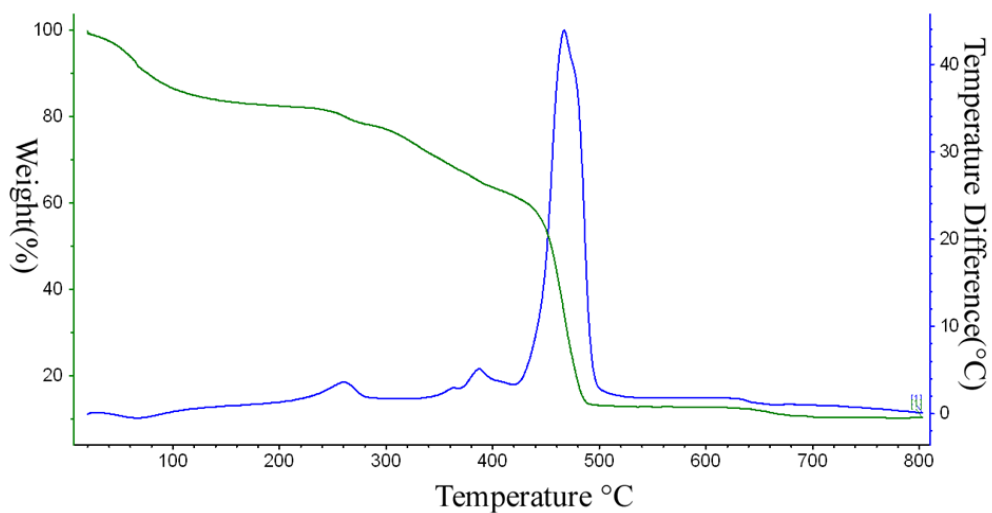

Fig S8 TGA of compound **1**.

The crystal structure of compound **1** contains both dissociative and coordinated water molecules. The observed mass loss (15.1%) while heating up to 120 °C is attributed to the loss of dissociative or coordinated water molecules.
